# Supplementary material for: Architecture of a Host–Parasite Interface: Complex Targeting Mechanisms Revealed Through Proteomics
Source: PubMed Central journal article supplement (PMC4587319; doi:10.1074/mcp.m114.047647), 2015-04-30

# Supplemental Figure 6

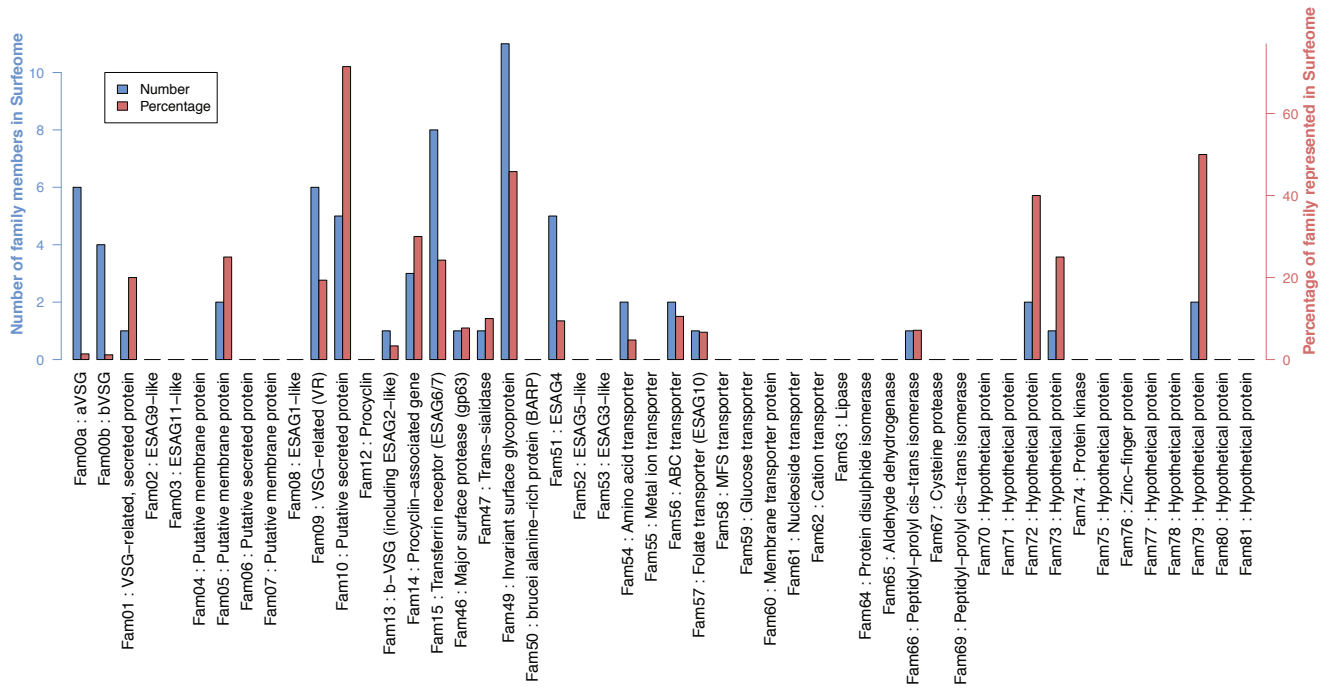

Supplement: supp_M114.047647_mcp.M114.047647-7.pdf [file supp_M114.047647_mcp.M114.047647-7.pdf]
